# Supplementary material for: What Is Regenerative Agriculture? A Review of Scholar and Practitioner Definitions Based on Processes and Outcomes
Source: Frontiers journal article supplement (doi:10.3389/fsufs.2020.577723), 2020-10-26
Supplement: Table_1.docx [file Table_1.docx]

**Table S1.** List of the 229 journal articles reviewed for this paper

Abbasov, E. A. (2015). The status of environmental friendly agriculture in Azerbaijan and its improvement directions. *Turkish Studies* 10, 1–26. https://doi.org/10.7827/TurkishStudies.8235

Abuabara, L., Paucar-Caceres, A., & Burrowes-Cromwell, T. (2019). Consumers’ values and behaviour in the Brazilian coffee-in-capsules market: promoting circular economy. *International Journal of Production Research* 57, 7269–7288. https://doi.org/10.1080/00207543.2019.1629664

Agostino, M. (2016). Organic agriculture, greenhouse gas emissions and environmental efficiency: an empirical study on OECD countries. *International Journal of Economics and Finance* 8, 78. https://doi.org/10.5539/ijef.v8n11p78

Akabane, G., Kassai, J. R., & Galhardi, A. C. (2017). The permanent agriculture as a means of harmony between nature cycle and human being. *Journal of Environmental Science, Toxicology and Food Technology* 11, 46–55. https://doi.org/10.9790/2402-1106034655

Akca, H., Sayili, M., & Kurunc, A. (2005). Trade off between multifunctional agriculture, externality and environment. *Journal of Applied Sciences Research* 1, 298–301.

Al Shamsi, K. B., Compagnoni, A., Timpanaro, G., Cosentino, S. L., & Guarnaccia, P. (2018). A sustainable organic production model for “food sovereignty” in the United Arab Emirates and Sicily-Italy. *Sustainability* 10, 620. https://doi.org/10.3390/su10030620

Alexandra, J., & Riddington, C. (2007). Redreaming the rural landscape. *Futures* 39, 324–339.

Alhinai, M., & Milstein, T. (2019). From kin to commodity: ecocultural relations in transition in Oman. *Local Environment* 24, 1078–1096. https://doi.org/10.1080/13549839.2019.1672635

Allen, T., & Prosperi, P. (2016). Modeling sustainable food systems. *Environmental Management* 57, 956–975.

Altieri, M. A., Nicholls, C. I., & Montalba, R. (2017). Technological approaches to sustainable agriculture at a crossroads: an agroecological perspective. *Sustainability* 9, 349. https://doi.org/10.3390/su9030349

Anwar, M. A., Zhou, R., Sajjad, A., & Asmi, F. (2019). Climate change communication as political agenda and voters’ behavior. *Environmental Science and Pollution Research* 26, 29946–29961. https://doi.org/10.1007/s11356-019-06134-6

Armon, J., & Armon, C. (2015). Cultivating intimacy with the natural world: college students’ care, connection, and regeneration in an agriculture-focused humanities course. *Journal of Sustainability Education* 9.

Ayala, S., & Prakasa Rao, E. V. S. (2002). Perspectives of soil fertility management with a focus on fertilizer use for crop productivity. *Current Science* 82, 797–807.

Bagarinao, T. (1998). Nature parks, museums, gardens, and zoos for biodiversity conservation and environment education: The Philippines. *Ambio* 27, 230–237. https://doi.org/10.2307/4314721

Bala, D. J., & Lu, W. (2009). Integrating Africa to global economy: Seeking a trilateral partnership of Sino-US and European Union. *African Journal of Agricultural Research* 4, 903–912.

Banjara, R. K., & Poudel, M. (2017). Sustainable model of organic agriculture: a case study of Nepalese farmers. *Journal of Advanced Academic Research* 3, 142–163. https://doi.org/10.3126/jaar.v3i1.16624

Beckford, C., Campbell, D., & Barker, D. (2011). Sustainable food production systems and food security: Economic and environmental imperatives in yam cultivation in Trelawny, Jamaica. *Sustainability* 3, 541–561. https://doi.org/10.3390/su3030541

Bennett, J. M., McBratney, A., Field, D., Kidd, D., Stockmann, U., Liddicoat, C., & Grover, S. (2019). Soil security for Australia. *Sustainability* 11, 3416. https://doi.org/10.3390/su11123416

Ben-Simchon, E., Sapir, E., Vaknin, Y., & Shelef, O. (2019). Malvaceae spp. leaves as a novel crop for food. *Journal of Agriculture Forestry and Life Sciences* 3, 279–286.

Berardi, G., Green, R., & Hammond, B. (2011). Stability, sustainability, and catastrophe: Applying resilience thinking to U. S. agriculture. *Human Ecology Review* 18, 115–125.

Beus, C. E., & Dunlap, R. E. (1990). Conventional versus alternative agriculture: the paradigmatic roots of the debate. *Rural Sociology* 55, 590–616. https://doi.org/10.1111/j.1549-0831.1990.tb00699.x

Blatz, C. V. (1997). The spirit of critical thinking and the possibility of cross-cultural criticism. *Inquiry: Critical Thinking Across the Disciplines* 17, 32–52. https://doi.org/10.5840/inquiryctnews199717230

Boggess, W. G. (2010). The changing politics of agriculture and the environment: what role for agricultural economists? *Journal of Agribusiness* 8, 85–94.

Bond, A. C. (2009). Contextual analysis of agroforestry adoption in the buffer zone of podocarpus national park, Ecuador. *Journal of Sustainable Forestry* 28, 825–843. https://doi.org/10.1080/10549810902794568

Boody, G., & Rivard, M. (1986). The rural crisis in Minnesota: Identifying social and economic vulnerability and new directions for the future. *Agriculture and Human Values* 3, 75–87. https://doi.org/10.1007/BF01535488

Brevik, E. C., Steffan, J. J., Rodrigo-Comino, J., Neubert, D., Burgess, L. C., & Cerdà, A. (2019). Connecting the public with soil to improve human health. *European Journal of Soil Science* 70, 898–910. https://doi.org/10.1111/ejss.12764

Broad, G. M. (2019). Plant-based and cell-based animal product alternatives: An assessment and agenda for food tech justice. *Geoforum* 107, 223–226. https://doi.org/10.1016/j.geoforum.2019.06.014

Bünemann, E. K., Bongiorno, G., Bai, Z., Creamer, R. E., De Deyn, G., de Goede, R., … Brussaard, L. (2018). Soil quality – A critical review. *Soil Biology and Biochemistry* 120, 105–125. https://doi.org/10.1016/j.soilbio.2018.01.030

Burkhardt, J. (1989). The morality behind sustainability. *Journal of Agricultural Ethics* 2, 113–128. https://doi.org/10.1007/BF01826927

Callicott, J. B. (1988). Agroecology in context. *Journal of Agricultural Ethics* 1, 3–9. https://doi.org/10.1007/BF02014458

Carlisle, L., de Wit, M. M., DeLonge, M. S., Calo, A., Getz, C., Ory, J., … Press, D. (2019). Securing the future of US agriculture: The case for investing in new entry sustainable farmers. *Elementa* 7, 17. https://doi.org/10.1525/elementa.356

Carter, A., Chennault, C., & Kruzic, A. (2018). Public action for public science: re-imagining the Leopold Center for Sustainable Agriculture. *Capitalism, Nature, Socialism* 29, 69–88. https://doi.org/10.1080/10455752.2017.1423364

Centemeri, L. (2018). Commons and the new environmentalism of everyday life. Alternative value practices and multispecies commoning in the permaculture movement. *Rassegna Italiana Di Sociologia* 59, 289–313. https://doi.org/10.1423/90581

Chen, R. Z., & Wong, M. H. (2016). Integrated wetlands for food production. *Environmental Research* 148, 429–442. https://doi.org/10.1016/j.envres.2016.01.007

Chiappe, M. B., & Flora, C. B. (1998). Gendered elements of the alternative agriculture paradigm. *Rural Sociology* 63, 372–393. https://doi.org/10.1111/j.1549-0831.1998.tb00684.x

Conway, C. (2019). Peer support model as catalyst for change. *Rural Extension & Innovation Systems Journal* 15, 81.

Cooperrider, D. L., & McQuaid, M. (2012). The positive arc of systemic strengths: how appreciative inquiry and sustainable designing can bring out the best in human systems. *Journal of Corporate Citizenship* 46, 71–102. https://doi.org/10.9774/gleaf.4700.2012.su.00006

Cordani, U. G. (2000). The role of the earth sciences in a sustainable world. *Episodes* 23, 155–162. https://doi.org/10.18814/epiiugs/2000/v23i3/002

Costanza, R., Caiglia, E., Fioramonti, L., Kubiszewski, I., Lewis, H., Lovins, H., McGlade, J., Mortensen, L. F., Philipsen, D., Pickett, K. E., Ragnarsdottir, K. V., Roberts, D., Sutton, P., Trebeck, K., Wallis, S., Ward, J., Weatherhead, M., & Wilkinson, R. (2018). Toward a sustainable wellbeing economy. *Solutions* 9, 2.

Coti-Zelati, P. E., Queiroz, M. J. de, & Araújo, D. L. A. de. (2019). The bullwhip effect in Brazilian supply chain of organic products: an analysis from the perspective of transaction cost theory. *Independent Journal of Management & Production* 10, 1015. https://doi.org/10.14807/ijmp.v10i3.843

Dahlberg, K. A. (1992). The conservation of biological diversity and U.S. agriculture: Goals, institutions, and policies. *Agriculture, Ecosystems and Environment* 42, 177–193. https://doi.org/10.1016/0167-8809(92)90026-8

Dahlberg, K. A. (1991). Sustainable agriculture: fad or harbinger? *BioScience* 41, 337–340.

Dahlberg, K. A. (1987). Redefining development priorities: genetic diversitv and agroecodevelopment. *Conservation Biology* 1, 311–322. https://doi.org/10.1111/j.1523-1739.1987.tb00051.x

Dan-Azumi, J. (2016). Constraints to smallholder agricultural productivity and sustainability in fadama areas. *Journal of Humanities and Social Science* 21, 61–73. https://doi.org/10.9790/0837-2106016173

Davies, P., & Lawrence, S. (2019). Engineered landscapes of the southern Murray–Darling Basin: Anthropocene archaeology in Australia. *Anthropocene Review* 6, 179–206. https://doi.org/10.1177/2053019619872826

Dawe, G. F. M., Vetter, A., & Martin, S. (2004). An overview of ecological footprinting and other tools and their application to the development of sustainability process: Audit and methodology at Holme Lacy College, UK. *International Journal of Sustainability in Higher Education* 5, 340–371. https://doi.org/10.1108/14676370410561063

de Haas, B. R., Hoekstra, N. J., van der Schoot, J. R., Visser, E. J. W., de Kroon, H., & van Eekeren, N. (2019). Combining agro-ecological functions in grass-clover mixtures. *AIMS Agriculture and Food* 4, 547–567. https://doi.org/10.3934/agrfood.2019.3.547

Delserone, L. M., & Bernholz, C. D. (2007). Tracking “organic” agricultural research in the United States, 1970-1989: What federal legislative and selected USDA-sponsored documents reveal. *Journal of Agricultural and Food Information* 8, 49–93. https://doi.org/10.1300/J108v08n01_06

Dias, B. D. (2018). Regenerative development: Building evolutive capacity for healthy living systems. *International Journal of Design & Nature and Ecodynamics* 13, 315–323.

Dibie, R. (2000). Indigenous participation in the environmental policy of Botswana and Ethiopia. *Journal of Sustainable Development in Africa* 2, 12–37.

Diop, A. M. (1999). Sustainable agriculture: New paradigms and old practices? Increased production with management of organic inputs in Senegal. *Environment, Development and Sustainability* 1, 285–296. https://doi.org/10.1023/a:1010026922142

Doh, J. P., Tashman, P., & Benischke, M. H. (2019). Adapting to grand environmental challenges through collective entrepreneurship. *Academy of Management Perspectives* 33, 450–468. https://doi.org/10.5465/amp.2017.0056

Doherty, P. (2012). Open-market sustainability. *Solutions* 3.

Drengson, A. R. (1985). The two philosophies of agriculture: from industrial paradigms to natural patterns. *The Trumpeter: Voices from the Canadian Ecophilosophy Network* 3, 17–22.

Duarte, L. O., Kohan, L., Pinheiro, L., Fonseca Filho, H., & Baruque-Ramos, J. (2019). Textile natural fibers production regarding the agroforestry approach. *SN Applied Sciences* 1, 1–10. https://doi.org/10.1007/s42452-019-0937-y

East, M. (2019). Maximising the edges of natural and human systems: The case for sociotones. *Sustainability* 11. https://doi.org/10.3390/SU11247203

East, M., & Mare, C. (2018). Community-based solutions to locally-sourced food production systems featuring the revival of indigenous knowledge. *Ecocycles* 4, 32–40. https://doi.org/10.19040/ecocycles.v4i1.96

Echeverria, M., & Nuti, M. (2017). Valorisation of the residues of coffee agro-industry: perspectives and limitations. *The Open Waste Management Journal* 10, 13–22. https://doi.org/10.2174/1876400201710010013

Egri, C. P. (1997). War and peace on the land: An analysis of the symbolism of organic farming. *Organizations and Societies* 3, 17–40. https://doi.org/10.1080/10245289708523486

Elevitch, C. R., Mazaroli, N. D., & Ragone, D. (2018). Agroforestry standards for regenerative agriculture. *Sustainability* 10, 1–21. https://doi.org/10.3390/su10093337

Erikson, G. R. (2018). An urbanist manifesto. *Journal of Ecology and Environmental Sciences* 6, 64–81.

Esbjornson, C. D. (1992). Once and future farming: Some meditations on the historical and cultural roots of sustainable agriculture in the United States. *Agriculture and Human Values* 9, 20–30. https://doi.org/10.1007/BF02217918

Falls, S. (2019). The Anthropocene goes green? *Economic Anthropology* 6, 157–159. https://doi.org/10.1002/sea2.12141

Fath, B. D., Fiscus, D. A., Goerner, S. J., Berea, A., & Ulanowicz, R. E. (2019). Measuring regenerative economics: 10 principles and measures undergirding systemic economic health. *Global Transitions* 1, 15–27. https://doi.org/10.1016/j.glt.2019.02.002

Ferdush, J., Karim, M. M., Himel, R., Saha, S., & Ahamed, T. (2018). Impact of alley cropping on wheat productivity. *IOSR Journal of Agriculture and Veterinary Science* 11, 17–25. https://doi.org/10.9790/2380-1102011725

Forje, J. W. (2007). Rethinking development: Going beyond the political and economic equations of the various human dimensions for sustainable development in Africa - Problems, prospects and the way forward. *International Journal of Sustainable Development and Planning* 2, 12–24. https://doi.org/10.2495/SDP-V2-N1-12-24

Fortunato, M. W. P., Alter, T. R., Adapa, S., & Thomas, P. (2017). Intentional innovation communities: concepts and preliminary evidence. *Economic Development Quarterly* 31, 100–115. https://doi.org/10.1177/0891242417691610

Francis, C. A., Harwood, R. R., & Parr, J. F. (1986). The potential for regenerative agriculture in the developing world. *American Journal of Alternative Agriculture* 1, 65–74. https://doi.org/10.1017/S0889189300000904

Freudenberger, C. D. (1988). Agricultural Agenda for the Twenty-First Century. *Pro Rege* 16, 15–21.

Gann, G. D., McDonald, T., Aronson, J., Dixon, K. W., Walder, B., Hallett, J. G., Decleer, K., Falk, D. A., Gonzales, E. K., Murci, C., Nelson, C. R., Unwin, A. J. (2018). The SER Standards: a globally relevant and inclusive tool for improving restoration practice—a reply to Higgs et al. *Restoration Ecology* 26, 426–430. https://doi.org/10.1111/rec.12819

Geisendorf, S., & Pietrulla, F. (2018). The circular economy and circular economic concepts—a literature analysis and redefinition. *Thunderbird International Business Review* 60, 771–782. https://doi.org/10.1002/tie.21924

George, K. P. (1994). Use and abuse revisited: Response to Pluhar and Varner. *Journal of Agricultural and Environmental Ethics* 7, 41–76. https://doi.org/10.1007/BF01997223

Ghimire, S. R., & Johnston, J. M. (2019). Sustainability assessment of agricultural rainwater harvesting: Evaluation of alternative crop types and irrigation practices. *PLoS ONE* 14. https://doi.org/10.1371/journal.pone.0216452

Giacomini, T. (2018). The 2017 United Nations climate summit: Women fighting for system change and building the commons at COP23 in Bonn, Germany. *Capitalism, Nature, Socialism* 29, 89–105. https://doi.org/10.1080/10455752.2018.1434217

Glynn, C. J., McDonald, D. G., & Tette, J. P. (1995). Integrated pest management and conservation behaviors. *Journal of Soil and Water Conservation* 50, 25–29.

Goede, M. (2016). The perspectives and practices on sustainable development of SIDS. *Journal of Social Science and Humanities Research* 2, 123–137.

Gomiero, T., Pimentel, D., & Paoletti, M. G. (2011). Is there a need for a more sustainable agriculture? *Critical Reviews in Plant Sciences* 30, 6–23. https://doi.org/10.1080/07352689.2011.553515

González-Chang, M., Tiwari, S., Sharma, S., & Wratten, S. D. (2019). Habitat management for pest management: limitations and prospects. *Annals of the Entomological Society of America* 112, 302–317. https://doi.org/10.1093/aesa/saz020

Goodland, R., Daly, H., & Kellenberg, J. (1994). Burden sharing in the transition to environmental sustainability. *Futures* 26, 146–155. https://doi.org/10.1016/0016-3287(94)90104-X

Goodwin, N. (2019). Addressing meta-externalities: investments in restoring the Earth. *Real-World Economics Review* (87), 36.

Gordon, M. A. (1989). Oral documentation and the sustainable agriculture movement in Wisconsin. *Public Historian* 11, 83–98. https://doi.org/10.2307/3378068

Gosnell, H., Gill, N., & Voyer, M. (2019). Transformational adaptation on the farm: Processes of change and persistence in transitions to ‘climate-smart’ regenerative agriculture. *Global Environmental Change* 59, 101965. https://doi.org/10.1016/j.gloenvcha.2019.101965

Goswami, R., Saha, S., & Dasgupta, P. (2017). Sustainability assessment of smallholder farms in developing countries. *Agroecology and Sustainable Food Systems* 41, 546–569. https://doi.org/10.1080/21683565.2017.1290730

Grant, S. (2017). Organizing alternative food futures in the peripheries of the industrial food system. *Journal of Sustainability Education* 14.

Gravuer, K., Gennet, S., & Throop, H. L. (2019). Organic amendment additions to rangelands: A meta-analysis of multiple ecosystem outcomes. *Global Change Biology* 25, 1152–1170. https://doi.org/10.1111/gcb.14535

Green, B. (2015). Australian education and rural-regional sustainability. *Australian and International Journal of Rural Education* 25, 36–49.

Hansen, J. W. (1996). Is agricultural sustainability a useful concept? *Agricultural Systems* 50, 117–143. https://doi.org/10.1016/0308-521X(95)00011-S

Hanson, J. C., Lichtenberg, E., & Peters, S. E. (1997). Organic versus conventional grain production in the mid-Atlantic: An economic and farming system overview. *American Journal of Alternative Agriculture* 12, 2–9. https://doi.org/10.1017/s0889189300007104

Harland, M. (2017). Permaculture: Tools for making women’s lives more abundant. *Feminist Theology* 25, 240–247. https://doi.org/10.1177/0966735017693769

Harvie, J. (2019). Early lessons from the food commons: a new economic whole system approach for regional food. *Journal of Agriculture, Food Systems, and Community Development*, 1–11. https://doi.org/10.5304/jafscd.2019.091.045

Hasan, M. M., Nekmahmud, M., Yajuan, L., & Patwary, M. A. (2019). Green business value chain: a systematic review. *Sustainable Production and Consumption* 20, 326–339. https://doi.org/10.1016/j.spc.2019.08.003

Haug, R. (1999). From integrated rural development to sustainable livelihoods: What is the role of food and agriculture? *Forum for Development Studies* 26, 181–201. https://doi.org/10.1080/08039410.1999.9666109

Hayat, M. (2016). Conflict between internationalist cultural exchange and market realism in world literature. *Journal of Critical Inquiry* 14, 16–30.

Helmers, G. A., Langemeier, M. R., & Atwood, J. (1986). An economic analysis of alternative cropping systems for east-central Nebraska. *American Journal of Alternative Agriculture* 1, 153–158. https://doi.org/10.1017/S0889189300001223

Hes, D., & Rose, N. (2019). Shifting from farming to tending the earth: A discussion paper. *Journal of Organics* 6, 1–21. https://doi.org/August 2019

Hintz, C. (2015). An ecology of love: women farmers, senes of place, the georgic ethic, and ecocentricity. *Journal of Sustainability Education* 9, 1–18.

Holt-Giménez, E. (2010). Linking farmers’ movements for advocacy and practice. *Journal of Peasant Studies* 37, 203–236. https://doi.org/10.1080/03066150903499943

Hotta, Y., Ito, N., & Murayama, A. (2005). The road to future food and medicine. *Niigata Journal of Health and Welfare* 5, 56–59.

Hu, R., & Shieh, C. J. (2015). Analysis of direct and indirect sales performance of organic agricultural products. *Custos e Agronegocio* 11, 93–105.

Ihlein, L., Fisher, L., Williams, K., & Mattsson, S. (2018). Socially engaged art and agriculture: experimenting with extension. *Journal of Sustainability Education* 17, 1–17.

Ingram, J. (2018). Agricultural transition: Niche and regime knowledge systems’ boundary dynamics. *Environmental Innovation and Societal Transitions* 26, 117–135. https://doi.org/10.1016/j.eist.2017.05.001

Johnston, C. F. (2019). A protestant rethinking of economics for a healthier world. *American Journal of Economics and Sociology* 78, 363–408. https://doi.org/10.1111/ajes.12268

Johnston, E. L. (2016). Agrarian dreams and neoliberal futures in life writing of the alternative food movement. *Food and Foodways* 24, 9–29. https://doi.org/10.1080/07409710.2016.1142779

Jordan, N. R., & Davis, A. S. (2015). Middle-way strategies for sustainable intensification of agriculture. *BioScience* 65, 513–519. https://doi.org/10.1093/biosci/biv033

Jung, L. S. (1988). Agricultural technology as if God were involved. *Reformed Review* 41.

Jung, L. S. (1986). Ethics, agriculture, and the material universe. *The Annual of the Society of Christian Ethics* 6, 219–250. https://doi.org/10.5840/asce1986611

Kamenetzky, M., & Maybury, R. H. (1989). Agriculture in harmony with nature. *Science and Public Policy* 16, 73–82. https://doi.org/10.1093/spp/16.2.73

Kassam, A., Friedrich, T., & Derpsch, R. (2019). Global spread of Conservation Agriculture. *International Journal of Environmental Studies* 76, 29–51. https://doi.org/10.1080/00207233.2018.1511353

Kenne, G. J., & Kloot, R. W. (2019). The carbon sequestration potential of regenerative farming practices in South Carolina, USA. *American Journal of Climate Change* 08, 157–172. https://doi.org/10.4236/ajcc.2019.82009

Kharel, G., Zheng, H., & Kirilenko, A. (2016). Can land-use change mitigate long-term flood risks in the Prairie Pothole Region? The case of Devils Lake, North Dakota, USA. *Regional Environmental Change* 16, 2443–2456. https://doi.org/10.1007/s10113-016-0970-y

Kherchi, I., Fellague, M., & Haddou, S. A. (2019). How Nestle applied shared value creation in agriculture sector achieving sustainable agriculture and making more profit «Nestle model». *Management & Economics Research Journal* 1, 12–26.

Kleppel, G. (2017). Introduction: The natural history of agricultural landscapes. *Northeastern Naturalist* 24, 1–4. https://doi.org/10.1656/045.024.0sp802

Klerkx, L., Jakku, E., & Labarthe, P. (2019). A review of social science on digital agriculture, smart farming and agriculture 4.0: New contributions and a future research agenda. *NJAS-Wageningen Journal of Life Sciences* 90, 100315.

Kline, M., & Domanjko, J. (2017). Mitigating global warming and climate change with design of super efficient greenhouse. *International Journal of Advanced Engineering Research and Science* 4, 97–102. https://doi.org/10.22161/ijaers.4.10.16

Kopnina, H. (2019). Just preservation and the half-earth view. *Animal Sentience* 4, 10.

Kroma, M. M. (2006). Organic farmer networks: Facilitating learning and innovation for sustainable agriculture. *Journal of Sustainable Agriculture* 28, 5–28. https://doi.org/10.1300/J064v28n04_03

Kumari, S., & Pradhan, S. S. (2018). Influence of green manuring and straw incorporation on organic carbon pools and productivity of paddy: A review. *Journal of Pharmacognosy and Phytochemistry* 7, 672–674.

LaCanne, C. E., & Lundgren, J. G. (2018). Regenerative agriculture: Merging farming and natural resource conservation profitably. *PeerJ* 6, e4428. https://doi.org/10.7717/peerj.4428

Levidow, L., Sansolo, D., & Schiavinatto, M. (2019). Agroecological practices as territorial development: an analytical schema from Brazilian case studies. *Journal of Peasant Studies* 1–26. https://doi.org/10.1080/03066150.2019.1683003

Li, J., Liu, B., Pan, H., Luo, S., Wyckhuys, K. A. G., Yuan, H., & Lu, Y. (2019). Buckwheat strip crops increase parasitism of *Apolygus lucorum* in cotton. *BioControl* 64, 645–654. https://doi.org/10.1007/s10526-019-09961-1

Liu, L. (2009). Sustainability: Living within one’s own ecological means. *Sustainability* 1, 1412–1430. https://doi.org/10.3390/su1041412

Lockeretz, W. (1988). Open questions in sustainable agriculture. *American Journal of Alternative Agriculture* 3, 174–181. https://doi.org/10.1017/S0889189300002460

Maccallum, T., Poynter, J., & Bearden, D. (2004). Lessons learned from biosphere 2: When viewed as a ground simulation/analog for long duration human space exploration and settlement. *SAE Transactions* 113, 1095–1104. https://doi.org/10.4271/2004-01-2473

Mahajan, N. C., Mrunalini, K., Prasad, K. S. K., Naresh, R. K., & Sirisha, L. (2019). Soil quality indicators, building soil organic matter and microbial derived inputs to soil organic matter under conservation agriculture ecosystem: a review. *International Journal of Current Microbiology and Applied Sciences* 8, 1859–1879. https://doi.org/10.20546/ijcmas.2019.802.218

Malchar-Michalska, D. (2011). Agricultural producer groups in Poland as a tool of sustainable development of rural areas. *Economic and Environmental Studies* 11, 11–26.

Malik, P., & Verma, M. (2014). Organic agricultural crop nutrient. In *Research Journal of Chemical Sciences* 4, 94–98.

Martinez-Alier, J. (1991). Ecology and the poor: a neglected dimension of Latin American history. *Journal of Latin American Studies* 23, 621–639. https://doi.org/10.1017/S0022216X0001587X

Maye, D. (2018). Examining innovation for sustainability from the bottom up: an analysis of the permaculture community in England. *Sociologia Ruralis*, *58*(2), 331–350. https://doi.org/10.1111/soru.12141

McCarthy, B., & Schurmann, A. (2015). Sustainable horticulture in North Queensland: resistance to the adoption of innovations? *Journal of New Business Ideas and Trends* 13, 15–38.

McDonald, D. G., & Glynn, C. J. (1994). Difficulties in measuring adoption of apple IPM: A case study. *Agriculture, Ecosystems and Environment* 48, 219–230. https://doi.org/10.1016/0167-8809(94)90104-X

McKenzie, F. (2013). Farmer-driven innovation in New South Wales, Australia. *Australian Geographer* 44, 81–95. https://doi.org/10.1080/00049182.2013.765349

McLaren, G. (2019). Health in an ecological civilization towards a process understanding of the dialectics of health. *Cosmos and History* 15, 427–481.

Michaud, J. P. (2018). Challenges to conservation biological control on the High Plains: 150 years of evolutionary rescue. *Biological Control* 125, 65–73. https://doi.org/10.1016/j.biocontrol.2018.07.001

Mickley, L. (1985). Trends in agriculture. *The Trumpeter* 2, 2–12.

Mishra, M. (2013). Role of eco-friendly agricultural practices in Indian agriculture development. *International Journal of Agriculture and Food Science Technology* 4, 11–15.

Mitchell, J. P., Reicosky, D. C., Kueneman, E. A., Fisher, J., & Beck, D. (2019). Conservation agriculture systems. *CAB Reviews: Perspectives in Agriculture, Veterinary Science, Nutrition and Natural Resources* 14. https://doi.org/10.1079/PAVSNNR201914001

Moles, J. A. (1989). Agricultural sustainability and traditional agriculture: learning from the past and its relevance to Sri Lanka. *Human Organization* 48, 70–78. https://doi.org/10.17730/humo.48.1.980771825278g4j0

Morganti, P., Danti, S., & Coltelli, M. B. (2018). Chitin and lignin to produce biocompatible tissues. *Research in Clinical Dermatology* 1, 5–11 https://doi.org/10.35841/clinical-dermatology.1.1.5-11

Murtilaksono, K., & Hidayat, Y. (2009). Education at Bogor Agricultural University: toward sustainable agricultural development in Indonesia. *Journal of Developments in Sustainable Agriculture* 4, 15–28. https://doi.org/10.11178/jdsa.4.15

Mutyambai, D. M., Bass, E., Luttermoser, T., Poveda, K., Midega, C. A. O., Khan, Z. R., & Kessler, A. (2019). More than “push” and “pull”? Plant-soil feedbacks of maize companion cropping increase chemical plant defenses against herbivores. *Frontiers in Ecology and Evolution* 7. https://doi.org/10.3389/fevo.2019.00217

Nalefo, L., Kamaruzaman Jusoff, M., Ali, S. S., Salman, D., Demalino, E. B., Meisanti, … Nurwati. (2013). Towards an institutional sustainable agriculture in Parabela. *World Applied Sciences Journal* 26, 55–59. https://doi.org/10.5829/idosi.wasj.2013.26.nrrdsi.26010

Nassauer, J. I. (1988). Landscape care: perceptions of local people in landscape ecology and sustainable development. *Landscape and Land Use Planning* 8, 27–41.

Neel, J. V. (1991). Priorities in the application of genetic principles to the human condition: A dissident view. *Perspectives in Biology and Medicine* 35, 49–67. https://doi.org/10.1353/pbm.1991.0029

Niesenbaum, R. A., Salazar, M. E., & Diop, A. M. (2004). Community forestry in the Mayan Biosphere Reserve in Guatemala. *Journal of Sustainable Forestry* 19, 11–28. https://doi.org/10.1300/J091v19n04_02

Nilsson, M. S. T., & Fearnside, P. M. (2011). Yanomami mobility and its effects on the forest landscape. *Human Ecology* 39, 235–256. https://doi.org/10.1007/s10745-011-9400-4

Norton, D. A., Reid, N., & Young, L. (2013). Ultimate drivers of native biodiversity change in agricultural systems. *F1000Research* 2, 214. https://doi.org/10.12688/f1000research.2-214.v1

Notarnicola, B., Hayashi, K., Curran, M. A., & Huisingh, D. (2012). Progress in working towards a more sustainable agri-food industry. *Journal of Cleaner Production* 28, 1–8. https://doi.org/10.1016/j.jclepro.2012.02.007

Odum, E. P. (1989). Input management of production systems. *Science* 243, 177–182. https://doi.org/10.1126/science.243.4888.177

Ohl, B., Wolf, S., & Anderson, W. (2008). A modest proposal: global rationalization of ecological footprint to eliminate ecological debt. *Sustainability: Science, Practice and Policy* 4, 5–16. https://doi.org/10.1080/15487733.2008.11908010

Olano, J. N. D. (1993). Non-government organizations’ (NGO’s) role in agricultural research. *Philippine Journal of Crop Science* 18, 13–17.

Oliferchuk, V. P., & Fedorovych, D. V. (2019). Application of mycorrhizal fungus Tuber melanosporum to stimulate the growth and development of soybean and spring barley. *Faktori Eksperimental’noi Evolucii Organizmiv* 24, 133–138. https://doi.org/10.7124/feeo.v24.1092

Oluoko-Odingo, A., & Mutisya, E. (2014). Organic or inorganic agriculture: the environmental costs and imperatives for African agriculture. *International Journal of Agriculture Innovations and Research* 2, 1101–1107.

Oyekale, A. S. (2012). Statistical evaluation of sustainability of selected crop production in Nigeria. *Life Science Journal* 9, 2769–2775.

Panagopoulos, T., & Antunes, D. (2017). The strategic research agenda for integrated spatial planning, land use and land management in Europe. *International Journal of Environmental Science* 2, 223–230.

Pasaribu, S. (2016). Factors affecting circular economy promotion in Indonesia: the revival of agribusiness partnership. *Forum Penelitian Agro Ekonomi* 24, 135. https://doi.org/10.21082/fae.v24n2.2006.135-144

Patel, S. J. (1989). Intellectual property rights in the Uruguay round: a disaster for the south? *Economic and Political Weekly* 24, 978–993.

Patro, A., & Talukdar, R.K. (2018). Doubling agri-income: an era of upskillment. *International Journal of Current Microbiology and Applied Sciences* (7), 4199–4288.

Pearson, C. J. (2007). Regenerative, semiclosed systems: A priority for twenty-first-century agriculture. *BioScience* 57, 409–418. https://doi.org/10.1641/B570506

Perković, A., Turalija, A., Lucijanić, M., & Takalić, M. (2014). English borrowings in the Croatian sustainable agriculture terminology. *Agricultura* 91.

Phadke, R. (2002). Assessing water scarcity and watershed development in Maharashtra, India: A case study of the Baliraja Memorial Dam. *Science Technology and Human Values* 27, 236–261. https://doi.org/10.1177/016224390202700203

Pillarisetti, J. R. (2002). World trade in environmentally sustainable agriculture products: policy issues for Australia. *Journal of Economic and Social Policy* 7, 66–82.

Pretty, J., & Hine, R. (2000). The promising spread of sustainable agriculture in Asia. *Natural Resources Forum* 24, 107–121. https://doi.org/10.1111/j.1477-8947.2000.tb00936.x

Provenza, F. D., Kronberg, S. L., & Gregorini, P. (2019). Is grassfed meat and dairy better for human and environmental health? *Frontiers in Nutrition* 6, 26. https://doi.org/10.3389/fnut.2019.00026

Ranjan, R., Divya, M., & Bavitha, M. (2015). The importance of soil food web for healthy environment and sustainable development. *International Journal of Applied Research* 1, 15–20.

Rasmussen, J., & Kaltoft, P. (2003). Alternative versus conventional attitudes in higher agricultural education. *Biological Agriculture & Horticulture* 20, 347–363. https://doi.org/10.1080/01448765.2003.9754978

Rasul, G., & Thapa, G. B. (2003). Sustainability analysis of ecological and conventional agricultural systems in Bangladesh. *World Development* 31, 1721–1741. https://doi.org/10.1016/S0305-750X(03)00137-2

Ravenscroft, N., Moore, N., Welch, E., & Hanney, R. (2013). Beyond agriculture: The counter-hegemony of community farming. *Agriculture and Human Values* 30, 629–639. https://doi.org/10.1007/s10460-013-9437-7

Rehman, S. U., Selvaraj, M., & Ibrahim, M. (2012). Foodgrain marketing with special reference to public distribution system in India - an analysis. *Journal of Economics and Management* 1.

Rhodes, C. J. (2014). Soil erosion, climate change and global food security: Challenges and strategies. *Science Progress* 97, 97–153. https://doi.org/10.3184/003685014X13994567941465

Rhodes, C. J. (2013). Feeding and healing the world: Through regenerative agriculture and permaculture. *Science Progress* 95, 345–446. https://doi.org/10.3184/003685012X13504990668392

Rhodes, C. J. (2017). The imperative for regenerative agriculture. *Science Progress* 100, 80–129. https://doi.org/10.3184/003685017X14876775256165

Rhodes, C. J. (2013). Peak phosphorus - peak food? The need to close the phosphorus cycle. *Science Progress* 96, 109–152. https://doi.org/10.3184/003685013X13677472447741

Rhodes, C. J. (2018). Pollinator decline – An ecological calamity in the making? *Science Progress* 101, 121–160. https://doi.org/10.3184/003685018X15202512854527

Rivera, J. A. (1996). Irrigation communities of the upper Rio Grande bioregion: Sustainable resource use in the global context. *Natural Resources Journal* 36, 491–519.

Roberts, B. (2000). NGO leadership success, and growth in Senegal: Lessons from ground level. *Urban Anthropology* 29, 143–180.

Robertson, P. G. (2015). A sustainable agriculture? *Daedalus* 144, 76–89. https://doi.org/10.1162/DAED_a_00355

Robinson, C. (1985). Criminal justice research: two competing futures. *Crime and Social Justice* 23, 101–128.

Robinson-Bertoni, S. (2017). Re-territorializing religiosity in wholesome Muslim praxis. *Religions* 8, 132. https://doi.org/10.3390/rel8070132

Rodale, R. (1986). Learning to think regeneratively. *Bulletin of Science, Technology & Society* 6, 6–13.

Romero-Díaz, A., de Vente, J., & Díaz-Pereira, E. (2019). Assessment of the ecosystem services provided by agricultural terraces. *Pirineos* 174. https://doi.org/10.3989/pirineos.2019.174003

Rose, N. (2017). Community food hubs: an economic and social justice model for regional Australia? *Rural Society* 26, 225–237. https://doi.org/10.1080/10371656.2017.1364482

Rosenzweig, S. T., Carolan, M. S., & Schipanski, M. E. (2020). A dryland cropping revolution? Linking an emerging soil health paradigm with shifting social fields among wheat growers of the High Plains. *Rural Sociology* 85, 545–574. https://doi.org/10.1111/ruso.12304

Rotondo, G., & Ardeleanu, M. P. (2015). The challenges of agriculture between sustainability and efficiency. *Calitatea* 16, 211–218.

Sachs, I. (1996). What state, what markets, for what development? The social, ecological and economical dimensions of planning. *Social Indicators Research* 39, 311–320. https://doi.org/10.1007/BF00286399

Sachs, I. (1995). Searching for new development strategies: the challenges of the social summt. *Economic and Political Weekly* 30, 1682–1685.

Sambell, R., Andrew, L., Godrich, S., Wolfgang, J., Vandenbroeck, D., Stubley, K., … Devine, A. (2019). Local challenges and successes associated with transitioning to sustainable food system practices for a west Australian context: Multi-sector stakeholder perceptions. *International Journal of Environmental Research and Public Health* 16, 2051. https://doi.org/10.3390/ijerph16112051

Sampson, R. N. (1982). Saving agricultural land: Environmental issue of the 1980’s. *Environmentalist* 2, 321–332. https://doi.org/10.1007/BF02603089

Sandor, M., & Schrader, S. (2007). Earthworms affect mineralization of different organic amendments in a microcosm study. *Bulletin of University of Agricultural Sciences and Veterinary Medicine Cluj-Napoca – Agriculture* 63, 442–447. https://doi.org/10.15835/buasvmcn-agr:1437

Sani, M. H. ., Kushwaha, S., Abubakar, M. M., & Ayoola, G. B. . (2011). Application of modified compromise weighted multi- objective programming in Fadama farming in Dass Local Government Area of Bauchi State , Nigeria. *Journal of Development and Agricultural Economics* 3, 423–429.

Sarkar, D., Shikha, Rakesh, S., Ganguly, S., & Rakshit, A. (2017). Management of increasing soil pollution in the ecosystem. *Advances in Research* 12, 1–9. https://doi.org/10.9734/air/2017/36622

Säumel, I., Reddy, S. E., & Wachtel, T. (2019). Edible city solutions-one step further to foster social resilience through enhanced socio-cultural ecosystem services in cities. *Sustainability* 11. https://doi.org/10.3390/su11040972

Sayin, C., Brumfield, R. G., Mencet, M. N., & Ozkan, B. (2005). The organic farming movement in Turkey. *HortTechnology* 15, 864–871. https://doi.org/10.21273/horttech.15.4.0864

Schoolman, E. D. (2019). Do direct market farms use fewer agricultural chemicals? Evidence from the US census of agriculture. *Renewable Agriculture and Food Systems* 34, 415–429.

Serchuk, F. M., & Smolowitz, R. J. (1990). Ensuring fisheries management dysfunction: The neglect of science and technology. *Fisheries* 15, 4–7. https://doi.org/10.1577/1548-8446(1990)015<0004:efmdtn>2.0.co;2

Shelef, O., Weisberg, P. J., & Provenza, F. D. (2017). The value of native plants and local production in an era of global agriculture. *Frontiers in Plant Science* 8. https://doi.org/10.3389/fpls.2017.02069

Sherren, K., & Kent, C. (2019). Who’s afraid of Allan Savory? Scientometric polarization on Holistic Management as competing understandings. *Renewable Agriculture and Food Systems* 34, 77–92. https://doi.org/10.1017/S1742170517000308

Sherwood, S., & Uphoff, N. (2000). Soil health: Research, practice and policy for a more regenerative agriculture. *Applied Soil Ecology* 15, 85–97. https://doi.org/10.1016/S0929-1393(00)00074-3

Shiva, V. (1999). Globalisation and threat to seed security: case of transgenic cotton trials in India. *Economic and Political Weekly* (10/11), 601. https://doi.org/10.2307/4407732

Stanley, P. L., Rowntree, J. E., Beede, D. K., DeLonge, M. S., & Hamm, M. W. (2018). Impacts of soil carbon sequestration on life cycle greenhouse gas emissions in Midwestern USA beef finishing systems. *Agricultural Systems* 162, 249–258. https://doi.org/10.1016/j.agsy.2018.02.003

Stephenson, M. (2011). Conceiving land grant university community engagement as adaptive leadership. *Higher Education* 61, 95–108. https://doi.org/10.1007/s10734-010-9328-4

Stoknes, P. E. (2019). How to achieve the Sustainable Development Goals within planetary boundaries by 2050. *Real-World Economics Review* (87), 231–246.

Stuchtey, M., & Vahle, T. (2019). Urban agriculture: boon or bust? *Field Actions Science Reports* (20), 60–67.

Swanepoel, C. M., Swanepoel, L. H., & Smith, H. J. (2018). A review of conservation agriculture research in South Africa. *South African Journal of Plant and Soil* 35, 297–306. https://doi.org/10.1080/02571862.2017.1390615

Swinburn, B. (2019). Power dynamics in 21st-century food systems. *Nutrients* 11. https://doi.org/10.3390/nu11102544

Tanaka, D. L., Karn, J. F., & Scholljegerdes, E. J. (2008). Integrated crop/livestock systems research: Practical research considerations. *Renewable Agriculture and Food Systems* 23, 80–86. https://doi.org/10.1017/S1742170507002165

Taylor, N. L. (2008). A century of clover breeding developments in the United States. *Crop Science* 48, 1–13. https://doi.org/10.2135/cropsci2007.08.0446

Thackara, J. (2019). Bioregioning: pathways to urban-rural reconnection. *She Ji: The Journal of Design, Economics, and Innovation* 5, 15–28. https://doi.org/10.1016/j.sheji.2019.01.002

Thomas, P., Adapa, S., Fortunato, M. W.-P., & Alter, T. (2015). Theory and practice of regional community based intentional innovation in northern inland New South Wales. *Australasian Journal of Regional Studies* 21, 323–348.

Tipraqsa, P., Craswell, E. T., Noble, A. D., & Schmidt-Vogt, D. (2007). Resource integration for multiple benefits: Multifunctionality of integrated farming systems in Northeast Thailand. *Agricultural Systems* 94, 694–703. https://doi.org/10.1016/j.agsy.2007.02.009

Tonukari, N. J., & Omotor, D. G. (2010). Biotechnology and food security in developing countries. *Biotechnology and Molecular Biology Reviews* 5, 13–023.

Treadwell, D. D., McKinney, D. E., & Creamer, N. G. (2003). From philosophy to science: A brief history of organic horticulture in the United States. *HortScience* 38, 1009–1014. https://doi.org/10.21273/hortsci.38.5.1009

Turner, G. M. (2019). Is a sustainable future possible? *Journal and Proceedings of the Royal Society of New South Wales* 152, 47–65.

Unay-Gailhard, İ., & Bojnec, Š. (2019). The impact of green economy measures on rural employment: Green jobs in farms. *Journal of Cleaner Production* 208, 541–551. https://doi.org/10.1016/j.jclepro.2018.10.160

Van De Fliert, E. (2003). Recognising a climate for sustainability: Extension beyond transfer of technology. *Australian Journal of Experimental Agriculture* 43, 29–36. https://doi.org/10.1071/EA01067

van den Berg, L., Roep, D., Hebinck, P., & Teixeira, H. M. (2018). Reassembling nature and culture: Resourceful farming in Araponga, Brazil. *Journal of Rural Studies* 61, 314–322. https://doi.org/10.1016/j.jrurstud.2018.01.008

Vander Zee, D., Vos, R., & Zee, V. (1990). Trends in agriculture: Sustainability. *Pro Rege* 18, 19–28.

Vlasov, M. (2019). In transition toward the ecocentric entrepreneurship nexus: how nature helps entrepreneur make venture more regenerative over time. *Organization and Environment* 1–22. https://doi.org/10.1177/1086026619831448

Vlasov, M., Bonnedahl, K. J., & Vincze, Z. (2018). Entrepreneurship for resilience: embeddedness in place and in trans-local grassroots networks. *Journal of Enterprising Communities* 12, 374–394. https://doi.org/10.1108/JEC-12-2017-0100

Walsh, P. W. (2019). “Unleafing Himself in a Sea of Cabbages”: Landscape and the Politics of Self-relinquishment in the Work of Gloria E. Anzaldúa. *ISLE Interdisciplinary Studies in Literature and Environment* 26, 262–295. https://doi.org/10.1093/isle/isz026

Wang, H., Qin, L., Huang, L., & Zhang, L. (2007). Ecological agriculture in China: Principles and applications. *Advances in Agronomy* 94, 181–208. https://doi.org/10.1016/S0065-2113(06)94004-8

White, R. E., & Andrew, M. (2019). Orthodox soil science versus alternative philosophies: A clash of cultures in a modern context. *Sustainability* 11. https://doi.org/10.3390/su11102919

Widener, P., & Karides, M. (2014). Food system literacy: Empowering citizens and consumers beyond farm-to-fork pathways. *Food, Culture and Society* 17, 665–687. https://doi.org/10.2752/175174414X14006746101916

Wratten, S. D., Shields, M. W., & González-Chang, M. (2019). Prospects for regenerative agriculture in Chile. *Agro Sur* 47, 1–6. https://doi.org/10.4206/agrosur.2019.v47n2-01

Xu, N., Bhadha, J. H., Rabbany, A., & Swanson, S. (2019). Soil health assessment of two regenerative farming practices on sandy soils. *Sustainable Agriculture Research* 8, 61. https://doi.org/10.5539/sar.v8n4p61

Yapa, L. (1998). The poverty discourse and the poor in Sri Lanka. *Transactions of the Institute of British Geographers* 23, 95–115. https://doi.org/10.1111/j.0020-2754.1998.00095.x

Yu, Y. Y. (2009). Harmonious development in West China based on constructive postmodernism. *Canadian Social Science* 5, 11–16.

Yunlong, C., & Smit, B. (1994). Sustainability in agriculture: a general review. *Agriculture, Ecosystems and Environment* 49, 299–307. https://doi.org/10.1016/0167-8809(94)90059-0

Zaferatos, N. C. (2011). Reviving the Mediterranean olive community. *Journal of Education for Sustainable Development* 5, 187–196. https://doi.org/10.1177/097340821100500209

Zhang, D., & Yang, Z. (2017). Adverse selection risk early-warning of agricultural insurance towards food quality safety — illustrated by an example of vegetable sites in Shandong province. *Journal of Systems Science and Information* 3, 248–263. https://doi.org/10.1515/jssi-2015-0248
